# Supplementary material for: Constructing heterostructured Li–Fe–Ni–Mn–O cathodes for lithium-ion batteries: effective improvement of ultrafast lithium storage
Source: Royal Society of Chemistry journal article supplement (doi:10.1039/c7cp04092j), 2017-01-01
Supplement: c7cp04092j1.pdf [file c7cp04092j1.pdf]

## Supplementary Information

### Constructing heterostructured Li-Fe-Ni-Mn-O cathodes for lithium-ion batteries: Effective improvement of ultrafast lithium storage

Taolin Zhao,<sup>a,b,\*</sup> Na Zhou,<sup>a,b</sup> Xiaoxiao Zhang,<sup>c</sup> Qing Xue,<sup>c</sup> Yuhua Wang,<sup>a,b</sup> Minli Yang,<sup>a,b</sup> Li Li<sup>c,d</sup> and Renjie Chen<sup>c,d,\*</sup>

---

<sup>a</sup> School of Materials Science and Engineering, Shijiazhuang Tiedao University, Shijiazhuang 050043, China.

<sup>b</sup> Hebei Provincial Key Laboratory of Traffic Engineering materials, Shijiazhuang 050043, China.

<sup>c</sup> School of Materials Science & Engineering, Beijing Key Laboratory of Environmental Science and Engineering, Beijing Institute of Technology, Beijing 100081, China.

<sup>d</sup> Collaborative Innovation Center of Electric Vehicles in Beijing, Beijing 100081, China

\* Corresponding author: zhaotl@stdu.edu.cn (T. Zhao); chenrj@bit.edu.cn (R. Chen)

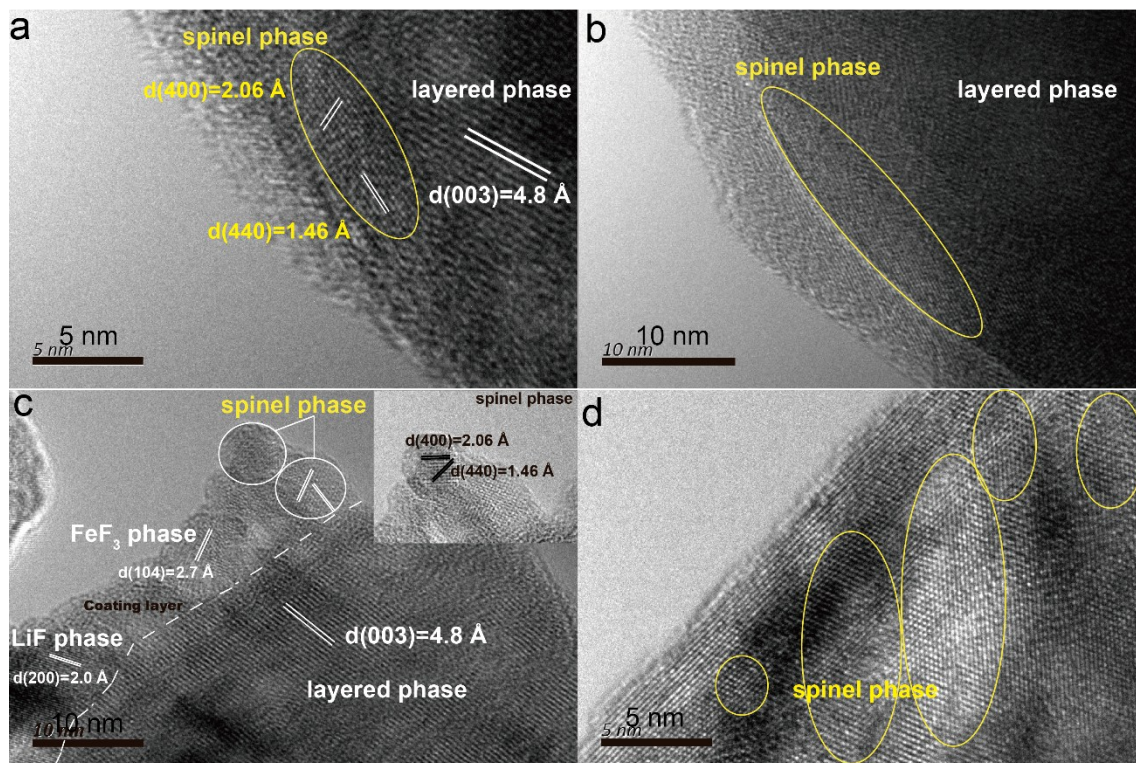

Fig. S1 HRTEM images of (a) FCL-5, (b) FCL-7, and (c, d) FCL-10 in different areas.

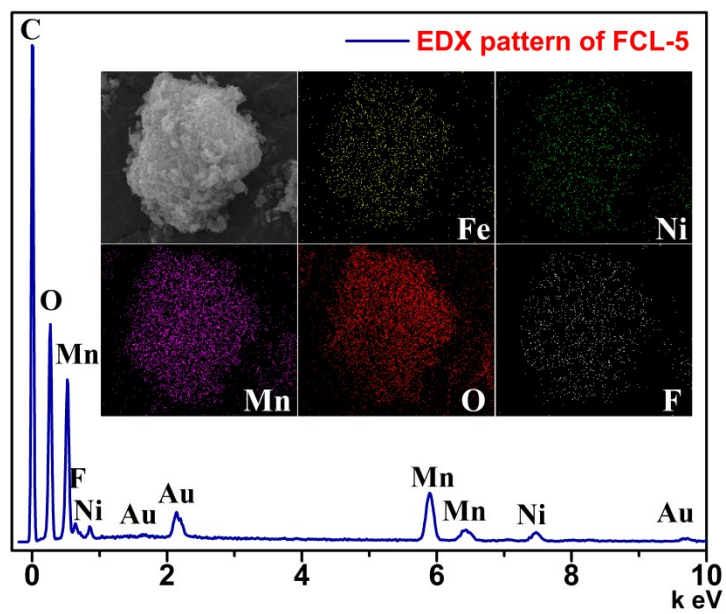

Fig. S2 EDX pattern and the element mappings of FCL-5.
